# Supplementary material for: Accumulation of Genetic and Epigenetic Alterations in the Background Liver and Emergence of Hepatocellular Carcinoma in Patients with Non-Alcoholic Fatty Liver Disease
Source: MDPI journal article supplement (doi:10.3390/cells10113257), 2021-11-21
Supplement: s1 [file s1]

Supplemental Table S1. Somatic mutations in the cancerous area due to NGS

|        | Severe fibrosis group |                          |                   |             |                         |                 |                       |              | Mild fibrosis group |              |              |            |                  |             |              |              |
|--------|-----------------------|--------------------------|-------------------|-------------|-------------------------|-----------------|-----------------------|--------------|---------------------|--------------|--------------|------------|------------------|-------------|--------------|--------------|
|        | 1                     | 2                        | 3                 | 4           | 5                       | 6               | 7                     | 8            | 9                   | 10           | 11           | 12         | 13               | 14          | 15           | 16           |
| TERT   |                       |                          |                   |             |                         |                 | nonsy (187)           |              |                     |              |              |            |                  |             |              |              |
| CTNNB1 |                       |                          |                   |             | nonsy (1881)            |                 |                       | nonsy (1688) | nonsy (1927)        | nonsy (1383) |              |            | nonsy (1346)     |             | nonsy (1683) |              |
| TP53   |                       | nonsy (562,28)           |                   |             |                         | nonsy (197)     |                       |              |                     | nonsy (44)   | nonsy (55)   | nonsy (57) | nonsy (64)       |             |              |              |
| SPTA1  | nonsy (2721)          |                          |                   |             |                         |                 |                       |              |                     |              |              |            |                  |             |              |              |
| HMCN1  |                       |                          |                   |             |                         |                 | nonsy (1756)          | nonsy (1651) | nonsy (954)         |              |              |            |                  |             | nonsy (104)  |              |
| RYR2   |                       |                          | nonsy (423,1567)  | nonsy (334) |                         |                 |                       | nonsy (259)  |                     |              |              |            |                  | nonsy (308) |              |              |
| APOB   |                       |                          |                   |             |                         |                 |                       |              |                     |              |              |            |                  |             |              |              |
| LRP1B  |                       |                          | nonsy (1880)      |             |                         |                 | nonsy (1141)          |              |                     |              |              |            |                  | nonsy (616) |              | nonsy (1556) |
| PIK3CA | nonsy (813)           | nonsy (1392)             |                   |             |                         |                 |                       | nonsy (390)  |                     |              |              |            |                  |             | nonsy (550)  | nonsy (510)  |
| GPR98  |                       |                          | nonsy (3,9)       | nonsy (36)  |                         | nonsy (3)       | nonsy (3,9,1076,1488) |              |                     |              |              |            |                  |             |              | nonsy (2350) |
| APC    |                       |                          | nonsy (969)       |             |                         |                 |                       |              |                     |              | nonsy (708)  |            |                  |             |              |              |
| FBN2   |                       | nonsy (3189)             |                   |             |                         |                 |                       |              |                     |              |              |            |                  |             |              |              |
| DST    |                       |                          |                   |             |                         |                 | nonsy (1753)          |              |                     |              |              |            |                  |             |              |              |
| SYNE1  |                       |                          |                   |             |                         | nonsy (917)     |                       |              |                     |              | nonsy (1299) |            |                  |             |              | nonsy (81)   |
| ARID1B |                       | nonsy (2)                |                   |             |                         |                 | frame (35)            |              |                     |              |              |            | nonsy (2801)     |             |              | frame (38)   |
| ABCA13 | nonsy (567)           |                          |                   |             |                         |                 |                       |              |                     |              |              |            |                  |             |              |              |
| EGFR   |                       |                          |                   |             |                         |                 |                       |              |                     |              |              |            |                  |             |              |              |
| PCLO   |                       |                          |                   | nonsy (637) |                         |                 |                       |              |                     | stop (263)   |              |            | nonsy (2382)     |             |              |              |
| TRRAP  |                       |                          |                   |             |                         | nonsy (1,9)     |                       |              |                     |              |              |            | nonsy (2786)     |             |              |              |
| PIK3CG |                       |                          |                   |             |                         |                 |                       |              |                     |              | frame (1,9)  |            |                  |             |              |              |
| BRAF   |                       |                          |                   |             |                         |                 |                       |              |                     |              |              |            |                  |             |              |              |
| MLL3   |                       | nonsy (109)<br>frame (2) |                   |             | nonsy (120)             | nonsy (102,132) |                       |              | nonsy (129,3)       |              |              |            |                  | nonsy (109) | nonsy (84)   |              |
| CSMD1  |                       |                          |                   |             | nonsy (214)             |                 |                       |              |                     |              |              |            |                  |             |              |              |
| CSMD3  |                       |                          |                   |             |                         |                 | nonsy (1181)          | nonsy (3707) |                     |              |              |            |                  |             |              |              |
| PTEN   | nonsy(82)             |                          |                   |             |                         |                 |                       |              |                     |              |              |            |                  |             |              | nonsy (72)   |
| FAT3   |                       |                          |                   |             |                         | nonsy (1193)    |                       |              | nonsy (699)         |              |              |            |                  |             |              |              |
| MLL    | nonsy (142)           |                          | nonsy (64,65,120) | nonsy (117) |                         |                 |                       |              |                     |              | nonsy (96)   |            | nonsy (142)      | nonsy (88)  |              |              |
| KRAS   |                       |                          |                   |             |                         |                 |                       |              |                     |              |              |            |                  |             |              |              |
| HNF1A  |                       |                          |                   |             |                         |                 |                       |              |                     |              |              |            |                  |             |              |              |
| AXIN1  |                       |                          |                   |             | nonsy (39)              |                 | nonsy (32)            |              |                     |              |              | nonsy (7)  |                  | nonsy (31)  |              |              |
| RYR1   |                       |                          |                   |             | frame(718)<br>nonsy(37) |                 |                       | frame (669)  |                     | nonsy (603)  |              |            |                  |             |              |              |
| ARID2  | nonsy (2909)          |                          |                   |             |                         |                 |                       |              | stop (934)          |              |              |            | frame (1140,960) |             | frame (1576) |              |
| CDKN2A |                       |                          |                   |             |                         |                 |                       |              |                     |              | nonsy (526)  |            |                  |             |              |              |
| ARID1A |                       |                          |                   |             |                         |                 |                       |              |                     |              |              | stop (100) |                  |             |              | frame (1971) |
| EFE2L2 |                       |                          |                   |             |                         |                 |                       |              |                     |              |              |            |                  |             |              |              |
| NFE2L2 |                       |                          |                   |             | nonsy (861)             |                 |                       |              |                     |              |              |            |                  |             | nonsy (889)  | nonsy (1783) |
| SMAD4  |                       |                          |                   |             |                         |                 | nonsy (448)           |              |                     |              |              |            |                  |             |              |              |

nonsy, noncynonymous ; stop, stop codon ; frame, frameshift
