# Supplementary material for: Accumulation of Genetic and Epigenetic Alterations in the Background Liver and Emergence of Hepatocellular Carcinoma in Patients with Non-Alcoholic Fatty Liver Disease
Source: MDPI journal article supplement (doi:10.3390/cells10113257), 2021-11-21
Supplement: s1 [file s1]

Supplemental Table S2. Somatic mutations in non-cancerous areas due to NGS

|        | Severe fibrosis group |              |              |             |   |             |            |             | Mild fibrosis group |             |            |    |              |            |             |              |
|--------|-----------------------|--------------|--------------|-------------|---|-------------|------------|-------------|---------------------|-------------|------------|----|--------------|------------|-------------|--------------|
|        | 1                     | 2            | 3            | 4           | 5 | 6           | 7          | 8           | 9                   | 10          | 11         | 12 | 13           | 14         | 15          | 16           |
| TERT   |                       |              |              |             |   |             |            |             |                     |             |            |    |              |            |             |              |
| CTNNB1 |                       |              |              |             |   |             |            |             |                     |             |            |    |              |            |             |              |
| TP53   |                       |              |              |             |   |             |            |             |                     | nonsy (42)  | nonsy (37) |    |              |            |             |              |
| SPTA1  |                       |              |              |             |   |             |            |             |                     |             |            |    |              |            |             |              |
| HMCN1  |                       |              |              |             |   |             |            |             | nonsy (791)         |             |            |    |              |            |             |              |
| RYR2   |                       |              | nonsy (732)  |             |   |             |            | nonsy (252) |                     |             |            |    |              |            |             |              |
| APOB   |                       |              |              |             |   |             |            |             |                     |             |            |    |              |            |             |              |
| LRP1B  |                       |              | nonsy (1055) |             |   |             |            |             |                     |             |            |    |              |            |             | nonsy (1045) |
| PIK3CA | nonsy (360)           | nonsy (838)  |              |             |   |             |            | nonsy (316) |                     |             |            |    |              |            | nonsy (448) | nonsy (251)  |
| GPR98  |                       |              |              |             |   |             |            |             |                     |             |            |    |              |            |             |              |
| APC    |                       |              |              |             |   |             |            |             |                     |             |            |    |              |            |             |              |
| FBN2   |                       | nonsy (2669) |              |             |   |             |            |             |                     |             |            |    |              |            |             |              |
| DST    |                       |              |              |             |   |             |            |             |                     |             |            |    |              |            |             |              |
| SYNE1  |                       |              |              |             |   | nonsy (882) |            |             |                     |             |            |    |              |            |             |              |
| ARID1B |                       |              |              |             |   |             |            |             |                     |             |            |    |              |            |             |              |
| ABCA13 | nonsy (324)           |              |              |             |   |             |            |             |                     |             |            |    |              |            |             |              |
| EGFR   |                       |              |              |             |   |             |            |             |                     |             |            |    |              |            |             |              |
| PCLO   |                       |              |              |             |   |             |            |             |                     |             |            |    | nonsy (2135) |            |             |              |
| TRRAP  |                       |              |              |             |   |             |            |             |                     |             |            |    |              |            |             |              |
| PIK3CG |                       |              |              |             |   |             |            |             |                     |             |            |    |              |            |             |              |
| BRAF   |                       |              |              |             |   |             |            |             |                     |             |            |    |              |            |             |              |
| MLL3   |                       |              |              |             |   |             |            |             |                     |             |            |    |              |            |             |              |
| CSMD1  |                       |              |              |             |   |             |            |             |                     |             |            |    |              |            |             |              |
| CSMD3  |                       |              |              |             |   |             |            |             |                     |             |            |    |              |            |             |              |
| PTEN   |                       |              |              |             |   |             |            |             |                     |             |            |    |              |            |             |              |
| FAT3   |                       |              |              |             |   |             |            |             |                     |             |            |    |              |            |             |              |
| MLL    | nonsy (71)            |              |              | nonsy (111) |   |             |            |             |                     |             | nonsy (64) |    | nonsy (74)   | nonsy (59) |             |              |
| KRAS   |                       |              |              |             |   |             |            |             |                     |             |            |    |              |            |             |              |
| HNF1A  |                       |              |              |             |   |             |            |             |                     |             |            |    |              |            |             |              |
| AXIN1  |                       |              |              |             |   |             | nonsy (17) |             |                     |             |            |    |              |            |             |              |
| RYR1   |                       |              |              |             |   |             |            |             |                     | nonsy (272) |            |    |              |            |             |              |
| ARID2  |                       |              |              |             |   |             |            |             |                     |             |            |    |              |            |             |              |
| CDKN2A |                       |              |              |             |   |             |            |             |                     |             |            |    |              |            |             |              |
| ARID1A |                       |              |              |             |   |             |            |             |                     |             |            |    |              |            |             |              |
| EFE2L2 |                       |              |              |             |   |             |            |             |                     |             |            |    |              |            |             |              |
| NFE2L2 |                       |              |              |             |   |             |            |             |                     |             |            |    |              |            |             |              |
| SMAD4  |                       |              |              |             |   |             |            |             |                     |             |            |    |              |            |             |              |

noncy, noncynonymous ; stop, stop codon ; frame, frameshift
