# Supplementary material for: Accumulation of Genetic and Epigenetic Alterations in the Background Liver and Emergence of Hepatocellular Carcinoma in Patients with Non-Alcoholic Fatty Liver Disease
Source: MDPI journal article supplement (doi:10.3390/cells10113257), 2021-11-21
Supplement: s1 [file s1]

Supplemental Table S3. Methylation levels and typical functions in each patient

|                       | TM6SF1  | DKK3    | BMP4    | EFNB2   | BVES    | CHGA    | NPTX2   | SPINT2  | PPP1R14A | FOXL2   | TTBK1   |
|-----------------------|---------|---------|---------|---------|---------|---------|---------|---------|----------|---------|---------|
| Control group         |         |         |         |         |         |         |         |         |          |         |         |
| Control 1             | 0.08599 | 0.24415 | 0.12916 | 0.10513 | 0.07850 | 0.10714 | 0.07829 | 0.25523 | 0.11608  | 0.04412 | 0.07359 |
| Control 2             | 0.06444 | 0.12918 | 0.12154 | 0.10415 | 0.06840 | 0.07972 | 0.06877 | 0.20915 | 0.13389  | 0.02651 | 0.10381 |
| Control 3             | 0.05680 | 0.15342 | 0.08708 | 0.09653 | 0.02635 | 0.03365 | 0.03974 | 0.09104 | 0.06880  | 0.02379 | 0.07005 |
| Control 4             | 0.11193 | 0.12879 | 0.11757 | 0.10167 | 0.05536 | 0.07470 | 0.04568 | 0.12844 | 0.11854  | 0.04345 | 0.09986 |
| Control 5             | 0.10411 | 0.17505 | 0.11929 | 0.12192 | 0.05114 | 0.08862 | 0.16689 | 0.21873 | 0.10439  | 0.03464 | 0.08087 |
| Control 6             | 0.11057 | 0.17228 | 0.09983 | 0.13024 | 0.07828 | 0.16796 | 0.10701 | 0.28905 | 0.21317  | 0.05704 | 0.11970 |
| Control 7             | 0.11257 | 0.22477 | 0.15384 | 0.14963 | 0.10119 | 0.21946 | 0.10673 | 0.28449 | 0.26461  | 0.04974 | 0.15416 |
| Control 8             | 0.08836 | 0.14717 | 0.11829 | 0.12457 | 0.08462 | 0.09762 | 0.08049 | 0.22351 | 0.18696  | 0.04547 | 0.06015 |
| Control 9             | 0.13523 | 0.17943 | 0.15658 | 0.11014 | 0.10110 | 0.10665 | 0.12368 | 0.22191 | 0.13829  | 0.07579 | 0.10147 |
| Control 10            | 0.15173 | 0.17854 | 0.19328 | 0.13144 | 0.08389 | 0.06450 | 0.08943 | 0.19115 | 0.11886  | 0.06459 | 0.09535 |
| Severe fibrosis group |         |         |         |         |         |         |         |         |          |         |         |
| NT 1                  | 0.10667 | 0.18832 | 0.13418 | 0.11278 | 0.09254 | 0.23834 | 0.25328 | 0.03427 | 0.1281   | 0.06109 | 0.14296 |
| NT 2                  | 0.09438 | 0.16187 | 0.11592 | 0.10912 | 0.09507 | 0.19002 | 0.23575 | 0.02893 | 0.14549  | 0.11146 | 0.14756 |
| NT 3                  | 0.18818 | 0.23209 | 0.14859 | 0.15697 | 0.12832 | 0.25821 | 0.30872 | 0.10649 | 0.25957  | 0.11018 | 0.17048 |
| NT 4                  | 0.1874  | 0.15931 | 0.10923 | 0.10634 | 0.14402 | 0.17229 | 0.13225 | 0.03215 | 0.25066  | 0.09878 | 0.17666 |
| NT 5                  | 0.11076 | 0.17384 | 0.08361 | 0.10655 | 0.06215 | 0.10908 | 0.12388 | 0.02193 | 0.17367  | 0.05307 | 0.12606 |
| NT 6                  | 0.12346 | 0.18353 | 0.16062 | 0.1344  | 0.13    | 0.19059 | 0.18082 | 0.1772  | 0.22033  | 0.08339 | 0.15601 |
| NT 7                  | 0.14349 | 0.26247 | 0.09722 | 0.08633 | 0.09879 | 0.2163  | 0.21309 | 0.01981 | 0.25905  | 0.07633 | 0.19758 |
| NT 8                  | 0.14453 | 0.24855 | 0.21508 | 0.15297 | 0.11861 | 0.23419 | 0.26312 | 0.19386 | 0.18674  | 0.10117 | 0.13839 |
| HCC 1                 | 0.30843 | 0.47097 | 0.04642 | 0.07502 | 0.0438  | 0.42071 | 0.40601 | 0.44755 | 0.02195  | 0.24484 | 0.05395 |
| HCC 2                 | 0.61932 | 0.57651 | 0.45779 | 0.57596 | 0.64073 | 0.57839 | 0.57535 | 0.61791 | 0.5486   | 0.51472 | 0.50083 |
| HCC 3                 | 0.37609 | 0.54566 | 0.64566 | 0.63333 | 0.57166 | 0.6489  | 0.54342 | 0.60442 | 0.58814  | 0.53452 | 0.60746 |
| HCC 4                 | 0.56958 | 0.42756 | 0.1689  | 0.50501 | 0.59026 | 0.61475 | 0.75356 | 0.10009 | 0.46797  | 0.22572 | 0.71552 |
| HCC 5                 | 0.68358 | 0.22338 | 0.14377 | 0.08785 | 0.23533 | 0.65474 | 0.21906 | 0.21676 | 0.43374  | 0.1555  | 0.07006 |
| HCC 6                 | 0.49753 | 0.50667 | 0.44569 | 0.45063 | 0.38954 | 0.22117 | 0.56711 | 0.43935 | 0.462    | 0.48076 | 0.38653 |
| HCC 7                 | 0.79292 | 0.86668 | 0.87053 | 0.75847 | 0.78777 | 0.80224 | 0.82409 | 0.59768 | 0.7918   | 0.72815 | 0.31625 |
| HCC 8                 | 0.21651 | 0.82918 | 0.81255 | 0.82217 | 0.26641 | 0.28322 | 0.60338 | 0.84477 | 0.87194  | 0.65645 | 0.60927 |
| Mild fibrosis group   |         |         |         |         |         |         |         |         |          |         |         |
| NT 9                  | 0.08913 | 0.11372 | 0.05716 | 0.09735 | 0.0488  | 0.10255 | 0.06931 | 0.03748 | 0.19507  | 0.03375 | 0.11031 |
| NT 10                 | 0.09597 | 0.23024 | 0.1932  | 0.14037 | 0.11479 | 0.15276 | 0.15676 | 0.21874 | 0.16241  | 0.0514  | 0.12375 |
| NT 11                 | 0.13834 | 0.22113 | 0.16415 | 0.1559  | 0.13615 | 0.20402 | 0.14985 | 0.27737 | 0.15484  | 0.05595 | 0.10497 |
| NT 12                 | 0.14537 | 0.24082 | 0.17016 | 0.18617 | 0.12985 | 0.19703 | 0.15342 | 0.21073 | 0.16425  | 0.09069 | 0.11671 |
| NT 13                 | 0.09886 | 0.23365 | 0.14902 | 0.15466 | 0.06589 | 0.15904 | 0.1682  | 0.25264 | 0.16067  | 0.05632 | 0.10028 |
| NT 14                 | 0.14572 | 0.17252 | 0.12484 | 0.16545 | 0.09575 | 0.20622 | 0.25707 | 0.02356 | 0.20979  | 0.09491 | 0.1824  |
| NT 15                 | 0.08505 | 0.17989 | 0.09785 | 0.08776 | 0.08198 | 0.11413 | 0.0823  | 0.0557  | 0.17269  | 0.05249 | 0.13372 |
| NT 16                 | 0.0893  | 0.30419 | 0.12693 | 0.11037 | 0.08099 | 0.14187 | 0.1819  | 0.0323  | 0.25991  | 0.08996 | 0.10571 |
| HCC 9                 | 0.77145 | 0.46089 | 0.84177 | 0.72029 | 0.79973 | 0.76246 | 0.78757 | 0.69333 | 0.4495   | 0.72451 | 0.8965  |
| HCC 10                | 0.5253  | 0.51897 | 0.74348 | 0.73322 | 0.59673 | 0.70406 | 0.75467 | 0.6533  | 0.64106  | 0.48226 | 0.20158 |
| HCC 11                | 0.77264 | 0.64475 | 0.0225  | 0.5949  | 0.10881 | 0.45457 | 0.83417 | 0.39657 | 0.81665  | 0.16998 | 0.89548 |
| HCC 12                | 0.65561 | 0.61859 | 0.62117 | 0.67484 | 0.63049 | 0.62137 | 0.72638 | 0.4104  | 0.494    | 0.58195 | 0.80334 |
| HCC 13                | 0.66068 | 0.54426 | 0.48792 | 0.50643 | 0.5663  | 0.62951 | 0.68191 | 0.60031 | 0.46925  | 0.20726 | 0.57965 |
| HCC 14                | 0.72157 | 0.74133 | 0.73808 | 0.75879 | 0.71157 | 0.64218 | 0.74412 | 0.58915 | 0.58786  | 0.69907 | 0.85673 |
| HCC 15                | 0.68436 | 0.72378 | 0.56026 | 0.67354 | 0.76401 | 0.61582 | 0.75026 | 0.63451 | 0.66533  | 0.62701 | 0.85719 |
| HCC 16                | 0.06864 | 0.75202 | 0.7136  | 0.75812 | 0.00278 | 0.10591 | 0.15307 | 0.02009 | 0.66694  | 0.01301 | 0.05893 |

Gene function

TM6SF1; Cell proliferation inhibition (ref. Cell Oncol 2014;37:297-303)

DKK3;T cell activation (ref. Eur J Med Res 2021;26:93)

BMP4;Tumor suppressor gene (ref. J Gastroenterol. 2019;54:1007-1018)

EFNB2;Wound healing (ref. World J Gastroenterol. 2005;11:4024-31)

BVES;EMT suppression (ref. Dig Dis Sci 2014;59:992-1000)

CHGA;Mitochondrial function failure (ref. Life Sci. 2021;284:119905)

NPTX2;Tumor suppressor gene (Int J Clin Pract 2021 ;75:e14443)

SPINT2; Cell migration inhibition (ref. Cell Oncol 2020;43:107-121)

PPP1R14A; Activation of TNF  $\alpha$  and IL1B (ref. Exp Dermatol 2013;22:494-6)

FOXL2;Tumor suppressor gene (ref. Int J Mol Med. 2019 ;43:567-574)

TTBK1;Cell migration inhibition (ref. J Cell Biol 2015;210:737-51)
